# Supplementary material for: Mapping Patterns and Trends in the Spatial Availability of Alcohol Using Low-Level Geographic Data: A Case Study in England 2003–2013
Source: MDPI journal article supplement (doi:10.3390/ijerph14040406), 2017-04-12
Supplement: s1 [file s1]

**Table S1.** Mean outlet density by deprivation and year with postcode deprivation fixed at baseline (2003) level.

| Outlet Type by Deprivation |                     | Mean Outlet Density (IQR) |             |             |             | Change from     | Mean % Change  |
|----------------------------|---------------------|---------------------------|-------------|-------------|-------------|-----------------|----------------|
| Quintile                   |                     | 2003                      | 2007        | 2010        | 2013        | 2003–2013 (IQR) | from 2003–2013 |
| On-trade                   | Q1 (most deprived)  | 40.2 (10–44)              | 38.9 (9–42) | 36.6 (9–37) | 34.6 (7–34) | –5.6 (–9––1)    | –14.0%         |
|                            | Q2                  | 31.9 (7–31)               | 31.7 (7–30) | 30.4 (6–28) | 29.5 (6–26) | –2.4 (–5–0)     | –7.6%          |
|                            | Q3                  | 18.8 (3–20)               | 18.8 (3–19) | 18.3 (3–18) | 17.8 (2–17) | –1 (–3–0)       | –5.4%          |
|                            | Q4                  | 11.5 (2–13)               | 11.4 (2–13) | 11 (2–12)   | 10.7 (2–11) | –0.8 (–2–0)     | –7.2%          |
|                            | Q5 (least deprived) | 9.3 (3–11)                | 9.3 (3–11)  | 9 (3–11)    | 8.8 (2–10)  | –0.5 (–1–0)     | –5.4%          |
| Off-trade                  | Q1 (most deprived)  | 12.7 (6–18)               | 14.3 (7–19) | 15.4 (7–21) | 17.1 (8–23) | 4.4 (1–6)       | 34.8%          |
|                            | Q2                  | 9.4 (3–13)                | 10.9 (4–15) | 11.8 (5–16) | 13 (5–17)   | 3.6 (1–5)       | 37.9%          |
|                            | Q3                  | 5.8 (1–8)                 | 6.7 (1–9)   | 7.2 (1–10)  | 7.9 (1–11)  | 2.1 (0–3)       | 36.3%          |
|                            | Q4                  | 3.8 (0–5)                 | 4.5 (0–7)   | 4.8 (0–7)   | 5.2 (0–8)   | 1.4 (0–2)       | 36.6%          |
|                            | Q5 (least deprived) | 3.4 (1–5)                 | 4 (1–6)     | 4.3 (1–6)   | 4.6 (1–7)   | 1.2 (0–2)       | 35.1%          |

**Table S2.** Hierarchical growth model results: effects of deprivation on logged outlet density.

| Model Covariate and Level                                             |                              | Model Estimates (Standard Errors)   |                                     |                                    |                                     |                                     |                                     |
|-----------------------------------------------------------------------|------------------------------|-------------------------------------|-------------------------------------|------------------------------------|-------------------------------------|-------------------------------------|-------------------------------------|
|                                                                       |                              | Pubs, Bars & Nightclubs             | Restaurants                         | Other on-Trade                     | Supermarkets                        | Convenience Stores                  | Other off-Trade                     |
| Baseline (2003) logged outlet density (intercept)                     |                              | 1.225 (0.215)<br><i>p</i> < 0.0001  | −2.213 (0.503)<br><i>p</i> < 0.0001 | 0.824 (0.236)<br><i>p</i> < 0.0001 | −3.135 (0.182)<br><i>p</i> < 0.0001 | −1.584 (0.266)<br><i>p</i> < 0.0001 | −0.354 (0.34)<br><i>p</i> = 0.298   |
| Effect on intercept                                                   | IMD Q1 (most deprived)       | ref.                                | ref.                                | ref.                               | ref.                                | ref.                                | ref.                                |
|                                                                       | IMD Q2                       | −0.201 (0.003)                      | −0.239 (0.006)                      | −0.284 (0.004)                     | −0.256 (0.005)                      | −0.288 (0.006)                      | −0.27 (0.004)                       |
|                                                                       | IMD Q3                       | −0.381 (0.003)                      | −0.469 (0.007)                      | −0.575 (0.005)                     | −0.496 (0.005)                      | −0.514 (0.006)                      | −0.494 (0.005)                      |
|                                                                       | IMD Q4                       | −0.472 (0.003)                      | −0.692 (0.007)                      | −0.764 (0.005)                     | −0.654 (0.006)                      | −0.699 (0.006)                      | −0.651 (0.005)                      |
|                                                                       | IMD Q5 (least deprived)      | −0.509 (0.004)<br><i>p</i> < 0.0001 | −0.789 (0.008)<br><i>p</i> < 0.0001 | −0.78 (0.005)<br><i>p</i> < 0.0001 | −0.758 (0.006)<br><i>p</i> < 0.0001 | −0.83 (0.007)<br><i>p</i> < 0.0001  | −0.681 (0.006)<br><i>p</i> < 0.0001 |
| Slope (change in logged outlet density per year from baseline (2003)) |                              | −0.037 (0)<br><i>p</i> < 0.0001     | 0.018 (0.001)<br><i>p</i> < 0.0001  | −0.05 (0)<br><i>p</i> < 0.0001     | 0.069 (0)<br><i>p</i> < 0.0001      | 0.145 (0)<br><i>p</i> < 0.0001      | 0.032 (0)<br><i>p</i> < 0.0001      |
| Effect on slope                                                       | IMD Q1 (most deprived)       | ref.                                | ref.                                | ref.                               | ref.                                | ref.                                | ref.                                |
|                                                                       | IMD Q2                       | 0.012 (0)                           | 0 (0.001)                           | 0.007 (0)                          | −0.006 (0.001)                      | −0.013 (0.001)                      | −0.001 (0)                          |
|                                                                       | IMD Q3                       | 0.021 (0)                           | −0.004 (0.001)                      | 0.014 (0)                          | −0.016 (0.001)                      | −0.036 (0.001)                      | −0.006 (0)                          |
|                                                                       | IMD Q4                       | 0.026 (0)                           | 0.009 (0.001)                       | 0.021 (0)                          | −0.02 (0.001)                       | −0.036 (0.001)                      | −0.008 (0)                          |
|                                                                       | IMD Q5 (least deprived)      | 0.027 (0)<br><i>p</i> < 0.0001      | 0.021 (0.001)<br><i>p</i> < 0.0001  | 0.016 (0)<br><i>p</i> < 0.0001     | −0.021 (0.001)<br><i>p</i> < 0.0001 | −0.01 (0.001)<br><i>p</i> < 0.0001  | −0.014 (0)<br><i>p</i> < 0.0001     |
| Region                                                                | Variance (intercept)         | 0.42                                | 2.28                                | 0.50                               | 0.30                                | 0.64                                | 1.04                                |
| Postcode                                                              | Variance (intercept)         | 6.81                                | 14.33                               | 9.47                               | 11.97                               | 11.81                               | 11.68                               |
|                                                                       | Variance (slope)             | 0.01                                | 0.04                                | 0.02                               | 0.02                                | 0.03                                | 0.02                                |
|                                                                       | Covariance(intercept, slope) | −0.02                               | −0.18                               | −0.08                              | −0.03                               | −0.24                               | −0.14                               |
| Variance (residual)                                                   |                              | 0.24                                | 1.32                                | 0.55                               | 0.85                                | 0.99                                | 0.55                                |
